# Supplementary material
Source: Royal Society of Chemistry journal article supplement (doi:10.1039/d5nj04933d)
Supplement: d5nj04933d1.pdf [file d5nj04933d1.pdf]

# **Construction of environmentally durable, flame-retardant, and superhydrophobic melamine sponge functionalized with PDA and OTS for efficient oil-water separation**

Teng Chen <sup>a</sup>, Yunjiang Wo <sup>a</sup>, Xin Li <sup>a</sup>, Fei Yu <sup>b</sup>, Wenwei Tang <sup>a</sup>, Jie Yang <sup>a</sup>, Fayin Ju <sup>c</sup>, Kai He <sup>c</sup>,  
Ning Li <sup>c\*</sup>, Zhaojian Gao <sup>b\*</sup>

<sup>a</sup> School of Material and Chemical Engineering, Xuzhou University of Technology, Xuzhou,  
221018, People's Republic of China;

<sup>b</sup> School of Food and Biological Engineering, Xuzhou University of Technology, Xuzhou, 221018,  
People's Republic of China;

<sup>c</sup> Jiangsu Youzhong Micri-nano Semiconductor Technology Co., Ltd, Nantong, 226300, People's  
Republic of China

\*Corresponding author: [ln@youzhong.tech](mailto:ln@youzhong.tech) (Ning Li); [gaozhaojian@126.com](mailto:gaozhaojian@126.com) (Zhaojian Gao)

Tab. S1 Comparison of catalytic activity by various catalysts for the reduction of MB dye pollutants

| Materials                                 | absorption capacity (g/g) | Ref       |
|-------------------------------------------|---------------------------|-----------|
| PBa-PD@MS <sub>4.0%</sub>                 | 15.6-43.0                 | (1)       |
| PDMS-SiO <sub>2</sub> @ZIF-8@MS           | 58.5-114.3                | (2)       |
| PDMS@COF@MS                               | 24-58                     | (3)       |
| SA/Fe <sub>3</sub> O <sub>4</sub> @PCA/MS | 73.8-152.4                | (4)       |
| TEHFDS-MNPs/melamine sponge               | 39.8 -78.7                | (5)       |
| octadecylchlorosilane/melamine sponge     | 45-65                     | (6)       |
| S-MMP@MS                                  | 54.3-136.7                | (7)       |
| GA-Fe-HT melamine sponge                  | 65-105                    | (8)       |
| OTS@PDA@MS                                | 40.14-130.43              | This work |

## Reference:

- (1) M. X. Leng, T. Y. Ou, H. R. Huang, J. X. Li, J. X. He, X. M. Su, M. Xiao, H. Jia and C. X. Zhao, *Colloid. Surf. A.*, 2026, **729**, 138837.
- (2) W. X. Zu, X. Y. Shao, M. J. Sun, Y. Sun, Z. Liu, X. H. He, T. H. Zhou, S. J. Wang and X. J. Zhang, *J. Environ. Chem. Eng.*, 2025, **13**, 120192.
- (3) Y. Y. Wang, T. P. Jiang, W. J. Wei, L. L. Zeng, J. J. He, S. Chen, J. Y. Tang and Z. W. Gao, *J. Environ. Chem. Eng.*, 2025, **13**, 119872.
- (4) L. Chen, Y. K. Guo, P. Y. Cui, Z. X. Lin, J. L. Yao, S. A. R. Naqvi, Y. M. Sun and Y. N. Guo, *Colloid. Surfaces A.*, 2025, **726**, 137889.
- (5) Z. T. Li, H. T. Wu, W. Y. Chen, F. A. He and D. H. Li, *Sep. Purif. Technol.*, 2019, **212**, 40-50.
- (6) Q. P. Ke, Y. X. Jin, P. Jiang and J. Yu, *Langmuir*, 2014, **44**, 13137-13142.
- (7) J. W. Ji, Q. Jia and R. Y. Chen, *ACS Appl. Polym. Mater.*, 2024, **9**, 5287-5296.
- (8) L. P. Ding, M. Chen, H. Y. Lu, H. C. He, X. Liu and Y. Q. Wang, *Prog. Org. Coat.*, 2021, **151**, 106075.
